# Supplementary material for: A Complementary Sensory Tool for Children with Autism Spectrum Disorders
Source: Children (Basel). 2020 Nov 20;7(11):244. doi: 10.3390/children7110244 (PMC7699787; doi:10.3390/children7110244)
Supplement: Supplementary file 1 [file children-07-00244-s001.pdf]

**Table S1.** Behavioral Observation on Sensory Stimuli Questionnaire for Parents (BOSS-P). Versión original española: Cuestionario de Observación de la Conducta ante Estímulos Sensoriales para Padres de niños/as y adolescentes con Autismo/TEA (OCS-P).

| <b>TRASTORNOS DE LA MODULACIÓN SENSORIAL</b>     |                                                                           |
|--------------------------------------------------|---------------------------------------------------------------------------|
| 1.                                               | Muestra reacciones desproporcionadas cuando se le toca                    |
| 2.                                               | Muestra reacciones de pánico ante ruidos fuertes                          |
| 3.                                               | Muestra reacciones de rechazo al agua a la hora de ducharse o lavarse     |
| 4.                                               | Le molestan los lugares ruidosos y con mucha gente                        |
| 5.                                               | Cuando algo le contraría tarda mucho en recuperar la calma                |
| 6.                                               | Muestra desagrado ante actividades que impliquen giros o volteretas       |
| 7.                                               | No puede concentrarse o realizar tareas cuando hay ruido de fondo         |
| 8.                                               | Se pone nervioso ante fuentes luminosas muy potentes                      |
| 9.                                               | Toca o se lleva a la boca partes del cuerpo u objetos de forma frecuente  |
| 10.                                              | Le molestan especialmente los olores fuertes                              |
| 11.                                              | Le molestan algunas prendas de vestir, siente picor por algunos tejidos.  |
| 12.                                              | Le desagradan las actividades de higiene o mantenimiento personal         |
| 13.                                              | Los movimientos rápidos le resultan desagradables                         |
| <b>TRASTORNOS DE LA DISCRIMINACIÓN SENSORIAL</b> |                                                                           |
| 14.                                              | Atiende a su nombre o cuando se le llama                                  |
| 15.                                              | Comunica sensaciones destinadas a satisfacer necesidades básicas          |
| 16.                                              | Se da cuenta de cuando está cansado o agotado                             |
| 17.                                              | Muestra agrado cuando es abrazado por padres o familiares cercanos        |
| 18.                                              | Muestra placer cuando se satisfacen necesidades básicas                   |
| 19.                                              | Cuando está desconsolado se calma por las atenciones de los padres        |
| 20.                                              | Manifiesta placer o se sentirse a gusto ante determinadas situaciones.    |
| 21.                                              | Es capaz de percibir el peligro ante situaciones que puedan generar daños |
| 22.                                              | Es capaz de identificar en sí mismo y en los demás, emociones básicas     |
| 23.                                              | Es capaz de orientarse en el espacio                                      |
| 24.                                              | Nota que tiene el corazón acelerado cuando está cansado o excitado        |
| 25.                                              | Reconoce las cosas que le ponen nervioso                                  |
| 26.                                              | Tiene dificultades para el reconocimiento de las caras de las personas    |
| <b>TRASTORNOS MOTORES DE BASE SENSORIAL</b>      |                                                                           |
| 27.                                              | Presenta dificultades para identificar las partes de su propio cuerpo     |
| 28.                                              | Presenta incapacidad para reproducir movimientos del habla                |
| 29.                                              | Es capaz de montar en bicicleta, en patines o en patinetes                |
| 30.                                              | Es capaz de realizar imitaciones motoras simples                          |
| 31.                                              | Es capaz de abrocharse los botones o hacer lazadas para vestirse          |
| 32.                                              | Es capaz de apilar bloques pequeños o de ensartar cuentas en una cuerda   |
| 33.                                              | Es capaz de utilizar cubiertos con ambas manos                            |
| 34.                                              | Es capaz de realizar copias de dibujos simples.                           |
| 35.                                              | Muestra torpeza para escribir, utilizar el teclado del ordenador...       |
| 36.                                              | Muestra inseguridad bajando escaleras o cuestas y se agarra a barandillas |
| 37.                                              | Es capaz de regular la fuerza a la hora de agarrar los objetos            |
| 38.                                              | Es capaz de recortar con tijeras adecuadamente para su edad               |
| 39.                                              | Es capaz de dibujar o colorear dentro de los márgenes propuestos          |
| 40.                                              | Es capaz de realizar imitaciones motoras que contienen varios pasos       |
| 41.                                              | Es capaz de completar dibujos a los que le falta la mitad                 |
